# Supplementary material for: Exploring the posttreatment care experiences and unmet needs of breast cancer survivors: a descriptive phenomenological study
Source: Research Square preprint supplement (doi:10.21203/rs.3.rs-5029610/v1), 2024-10-21
Supplement: Supplementary file 1 [file 1c6f307f4e8ee8cac37e2999.docx]

**Table 1** Participant information at the time of the interview

| **ID** | **Age** | **Marital status** | **Family relationship** | **Occupation** | **Time of diagnosis** | **Treatment modality** | **Operation** | **Relapse** |
| --- | --- | --- | --- | --- | --- | --- | --- | --- |
| P1 | 39 | Remarried | Spouse, 1 child | Yes (on sick leave) | 38 | ①②④ | Breast Reconstruction | Yes |
| P2 | 38 | Married | Spouse | Yes (on sick leave) | 18 | ①②③④ | Mastectomy | No |
| P3 | 36 | Divorced | Parents,1 child | Yes (on sick leave) | 16 | ①②③④ | Mastectomy | No |
| P4 | 30 | Married | Spouse, 1 child | Yes (on sick leave) | 36 | ①②③④ | Mastectomy | Yes |
| P5 | 29 | Married | Spouse, 2 children | Yes (on sick leave) | 8 | ①②③④ | Breast Reconstruction | No |
| P6 | 27 | Single | Parents, 1 children | Yes (return to work) | 30 | ①②③⑤ | Mastectomy | No |
| P7 | 40 | Married | Spouse, 2 children | No(Resign) | 24 | ①②④ | Mastectomy | No |
| P8 | 40 | Married | Spouse, 1 child | Yes (on sick leave) | 50 | ①②④ | Mastectomy | Yes |
| P9 | 37 | Married | Spouse, 1 child | No(Resign) | 72 | ①②④⑤ | Conservative Surgery | Yes |
| P10 | 33 | Single | Parents | No(Resign) | 14 | ①②③④ | Breast Reconstruction | No |
| P11 | 36 | Married | Spouse, 1 child | Yes (return to work) | 36 | ①②④ | Breast Reconstruction | Yes |
| P12 | 37 | Married | Spouse, 2 children | NO(Resign) | 108 | ①② | Mastectomy | Yes |
| P13 | 32 | Married | Spouse, 1 child | Yes (on sick leave) | 16 | ①②③④ | Breast Reconstruction | Yes |
| P14 | 35 | Married | Spouse, 2 children | Yes (on sick leave) | 78 | ① | Breast Reconstruction | Yes |
| P15 | 28 | Single | Parents | Yes (return to work) | 12 | ①②④⑤ | Breast Reconstruction | NO |
| P16 | 39 | Married | Spouse,1 child | Yes (return to work) | 19 | ①② | Conservative Surgery | NO |
| P17 | 30 | Single | Parents | Yes (return to work) | 15 | ① | Conservative Surgery | NO |
| P18 | 45 | Married | Spouse, 1 child | Yes (return to work) | 8 | ①②③ | Breast Reconstruction | NO |
| P19 | 55 | Married | Spouse, 3 children | NO (retire) | 36 | ①②③ | Mastectomy | Yes |
| P20 | 58 | Married | Spouse, 1 child | NO (retire) | 25 | ①②③ | Mastectomy | Yes |

a ①Surgery; ②Chemotherapy; ③Radiation therapy; ④Endocrine therapy; ⑤Targeted therapy; ⑥Traditional Chinese medicine therapy.
