# Supplementary material for: Exploring the posttreatment care experiences and unmet needs of breast cancer survivors: a descriptive phenomenological study
Source: Research Square preprint supplement (doi:10.21203/rs.3.rs-5029610/v1), 2024-10-21
Supplement: Supplementary file 2 [file a1b18b2aff565bb5023e20b7.docx]

**Interview guide**

Interviewee Number: Interviewer:

Interview date: Duration of interview:

**Introduction**

- Introduce yourself and thank the participant for agreeing to be interviewed.
- Explain the purpose of the study
- Before you start the interview, obtain written informed consent and consent to record the interview.
- Prior to putting on the recorder obtain permission to record the interview.

**Background information:**

Age:

Marital status:

Family relationship：

Occupation:

Treatment details:

Operation Method:

Months since breast cancer：:

Relapse:

**Interview questions:**

1.What changes and problems have occurred since you were diagnosed with cancer (e.g. thoughts and behaviors about health, psychology, relationships, work, etc.)?

2.Please tell us how you feel after cancer treatment. How did you manage the problems that occurred after your cancer treatment?

3. How did you manage side effects and your health after cancer treatment? What was the most challenging aspect of managing your health?

4.What kind of support do you expect from your family for your cancer management?

5. What kind of integrated care support do you expect for your cancer management? (E.g., health care system, finances, counseling, etc.)

6. What kind of resources and support do you expect from the government for your cancer management?

**Concluding remarks:**

Thank you for your time. Are there any other questions that you would like to ask?

We have now come to the end of the interview.
