# Supplementary material for: Exploring the posttreatment care experiences and unmet needs of breast cancer survivors: a descriptive phenomenological study
Source: Research Square preprint supplement (doi:10.21203/rs.3.rs-5029610/v1), 2024-10-21
Supplement: Supplementary file 3 [file d7bf78303d31f08e97d6bbd3.docx]

**Table 1** Outline of the semi-structured in-depth interview

| 1. What changes and problems have occurred since you were diagnosed with cancer (e.g. thoughts and behaviors about health, psychology, relationships, work, etc.)? 2. Please tell us how you feel after cancer treatment. How did you manage the problems that occurred after your cancer treatment?   3. How did you manage side effects and your health after cancer treatment? What was the most challenging aspect of managing your health?  4. What kind of support do you expect from your family for your cancer management?  5. What kind of integrated care support do you expect for your cancer management? (E.g., health care system, finances, counseling, etc.)  6. What kind of resources and support do you expect from the government for your cancer management? |
| --- |
